# Supplementary material
Source: PubMed Central journal article supplement (PMC5165078)
Supplement: supp_dew289_dew289suppl_figure1.pdf [file supp_dew289_dew289suppl_figure1.pdf]

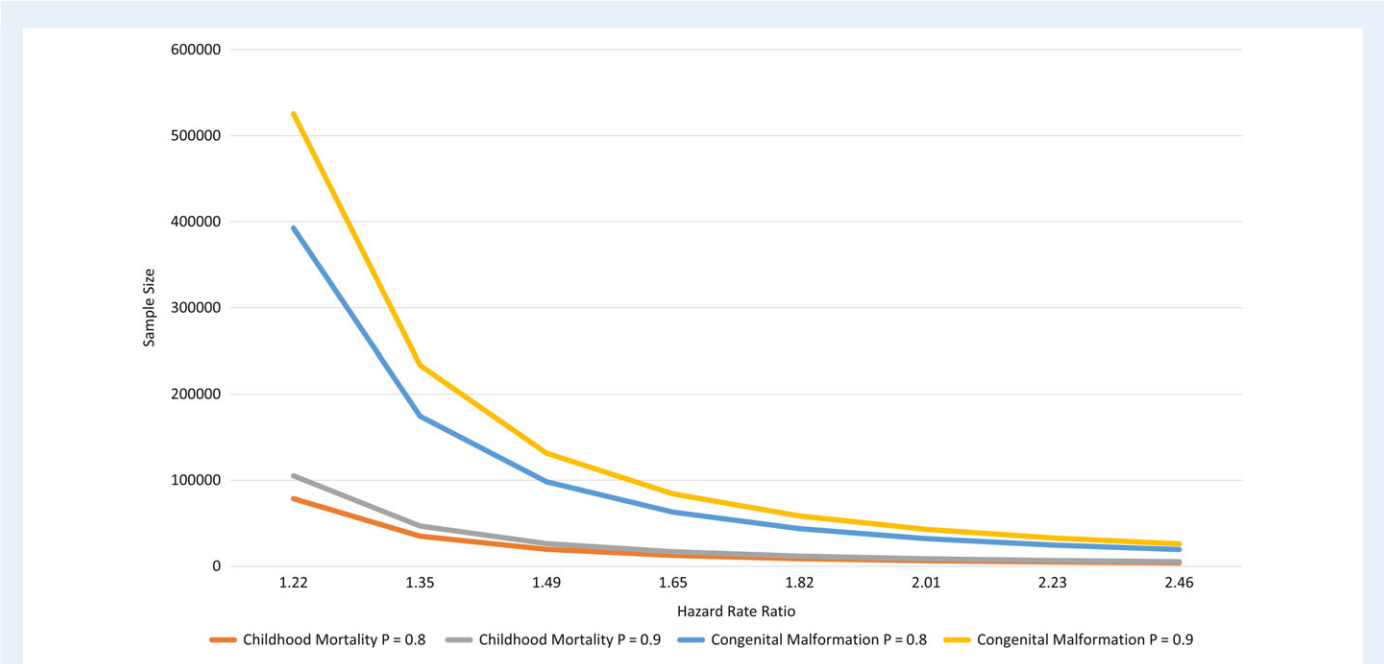

**Supplementary Figure S1** Sample size requirement at 80% and 90% power by Hazard Rate Ratio for all-cause and congenital malformation-related deaths.
