# Supplementary material
Source: PubMed Central journal article supplement (PMC5165078)
Supplement: supp_dew289_dew289suppl_figure2.pdf [file supp_dew289_dew289suppl_figure2.pdf]

|                                                                                                      | Model 1: Both                                                                                        | Model 2: By Gender                                                                                    |                                                                                                      | Model 3: Both Genders                                                                                |                                                                                                      |                                                                                                       |
|------------------------------------------------------------------------------------------------------|------------------------------------------------------------------------------------------------------|-------------------------------------------------------------------------------------------------------|------------------------------------------------------------------------------------------------------|------------------------------------------------------------------------------------------------------|------------------------------------------------------------------------------------------------------|-------------------------------------------------------------------------------------------------------|
|                                                                                                      | Genders                                                                                              | Female                                                                                                | Male                                                                                                 | Under Age 1                                                                                          | Age 1 - 5                                                                                            | Age 5 - 19                                                                                            |
| Siblings of Men with Semen Analysis<br>1.41 (1.02, 1.95)                                             | Azoospermia                                                                                          |                                                                                                       |                                                                                                      |                                                                                                      |                                                                                                      |                                                                                                       |
|                                                                                                      | 2.69 (1.24, 5.84)                                                                                    | No Sex differences                                                                                    |                                                                                                      | 0.64 (0.09, 4.63)                                                                                    | 5.98 (2.28, 15.65)                                                                                   | 5.05 (0.57, 44.40)                                                                                    |
|                                                                                                      | Concentration                                                                                        |                                                                                                       |                                                                                                      |                                                                                                      |                                                                                                      |                                                                                                       |
|                                                                                                      | O = 1.71 (0.90, 3.24)<br>N = 1.34 (0.91, 1.97)<br>H = 1.27 (0.81, 2.00)                              | O = 2.90 (1.31, 6.39)<br>N = 1.74 (1.00, 3.01)<br>H = 1.84 (0.99, 3.42)                               | O = 0.82 (0.25, 2.68)<br>N = 1.05 (0.60, 1.83)<br>H = 0.89 (0.45, 1.74)                              | O = 1.28 (0.50, 3.26)<br>N = 1.54 (0.95, 2.48)<br>H = 0.86 (0.44, 1.68)                              | O = 2.90 (1.16, 7.23)<br>N = 0.97 (0.46, 2.06)<br>H = 1.91 (0.95, 3.82)                              | O = 0.00 (0.00, 0.00)<br>N = 1.28 (0.31, 5.35)<br>H = 1.86 (0.44, 7.80)                               |
|                                                                                                      | Count                                                                                                |                                                                                                       |                                                                                                      |                                                                                                      |                                                                                                      |                                                                                                       |
|                                                                                                      | O = 1.43 (0.71, 2.88)<br>N = 1.37 (0.97, 1.93)<br>H = 1.19 (0.57, 2.47)                              | O = 2.21 (0.91, 5.37)<br>N = 1.97 (1.20, 3.22)<br>H = 1.10 (0.33, 3.62)                               | O = 0.85 (0.26, 2.77)<br>N = 0.94 (0.56, 1.56)<br>H = 1.25 (0.49, 3.18)                              | O = 1.05 (0.38, 2.94)<br>N = 1.37 (0.88, 2.14)<br>H = 0.74 (0.23, 2.41)                              | O = 2.46 (0.92, 6.57)<br>N = 1.33 (0.72, 2.47)<br>H = 1.84 (0.63, 5.36)                              | O = 0.00 (0.00, 0.00)<br>N = 1.45 (0.42, 4.99)<br>H = 1.88 (0.22, 15.96)                              |
|                                                                                                      | Motility                                                                                             |                                                                                                       |                                                                                                      |                                                                                                      |                                                                                                      |                                                                                                       |
|                                                                                                      | Q1 = 1.23 (0.73, 2.07)<br>Q2 = 1.55 (0.95, 2.54)<br>Q3 = 1.14 (0.66, 1.97)<br>Q4 = 1.48 (0.94, 2.33) | Q1 = 1.77 (0.88, 3.59)<br>Q2 = 2.50 (1.31, 4.78)<br>Q3 = 1.55 (0.73, 3.29)<br>Q4 = 1.83 (0.97, 3.46)  | Q1 = 0.83 (0.37, 1.85)<br>Q2 = 0.89 (0.40, 1.99)<br>Q3 = 0.86 (0.38, 1.93)<br>Q4 = 1.24 (0.64, 2.40) | Q1 = 1.47 (0.78, 2.75)<br>Q2 = 1.36 (0.70, 2.66)<br>Q3 = 0.82 (0.37, 1.84)<br>Q4 = 1.40 (0.77, 2.54) | Q1 = 0.85 (0.29, 2.48)<br>Q2 = 1.36 (0.70, 2.66)<br>Q3 = 0.82 (0.37, 1.84)<br>Q4 = 1.40 (0.77, 2.54) | Q1 = 0.93 (0.11, 8.07)<br>Q2 = 0.93 (0.11, 8.14)<br>Q3 = 0.00 (0.00, 0.00)<br>Q4 = 3.31 (0.93, 11.79) |
|                                                                                                      | Vitality                                                                                             |                                                                                                       |                                                                                                      |                                                                                                      |                                                                                                      |                                                                                                       |
|                                                                                                      | Q1 = 0.95 (0.42, 2.16)<br>Q2 = 2.53 (1.42, 4.52)<br>Q3 = 1.42 (0.74, 2.71)<br>Q4 = 0.78 (0.33, 1.86) | Q1 = 1.15 (0.32, 4.15)<br>Q2 = 4.72 (2.11, 10.58)<br>Q3 = 2.67 (1.10, 6.51)<br>Q4 = 0.72 (0.16, 3.22) | Q1 = 0.86 (0.29, 2.51)<br>Q2 = 1.22 (0.46, 3.21)<br>Q3 = 0.77 (0.27, 2.21)<br>Q4 = 0.85 (0.29, 2.49) |                                                                                                      |                                                                                                      |                                                                                                       |
|                                                                                                      | Total Motile Count                                                                                   |                                                                                                       |                                                                                                      |                                                                                                      |                                                                                                      |                                                                                                       |
|                                                                                                      | Q1 = 1.81 (0.96, 3.38)<br>Q2 = 0.85 (0.36, 2.02)<br>Q3 = 1.30 (0.65, 2.62)<br>Q4 = 1.56 (0.81, 3.00) | Q1 = 2.75 (1.10, 6.88)<br>Q2 = 1.65 (0.53, 5.11)<br>Q3 = 2.46 (0.97, 6.23)<br>Q4 = 2.20 (0.83, 5.86)  | Q1 = 1.23 (0.50, 3.06)<br>Q2 = 0.46 (0.11, 1.94)<br>Q3 = 0.65 (0.19, 2.21)<br>Q4 = 1.24 (0.51, 3.04) |                                                                                                      |                                                                                                      |                                                                                                       |
|                                                                                                      | Head Morphology                                                                                      |                                                                                                       |                                                                                                      |                                                                                                      |                                                                                                      |                                                                                                       |
|                                                                                                      | Q1 = 1.92 (1.00, 3.70)<br>Q2 = 1.83 (0.99, 3.39)<br>Q3 = 1.03 (0.48, 2.22)<br>Q4 = 0.96 (0.43, 2.15) | Q1 = 1.92 (1.00, 3.70)<br>Q2 = 1.83 (0.99, 3.39)<br>Q3 = 1.03 (0.48, 2.22)<br>Q4 = 0.96 (0.43, 2.15)  | Q1 = 3.47 (1.43, 8.37)<br>Q2 = 2.51 (1.01, 6.25)<br>Q3 = 1.72 (0.61, 4.86)<br>Q4 = 1.44 (0.47, 4.42) |                                                                                                      |                                                                                                      |                                                                                                       |
| Tail Morphology                                                                                      |                                                                                                      |                                                                                                       |                                                                                                      |                                                                                                      |                                                                                                      |                                                                                                       |
| Q1 = 1.35 (0.65, 2.81)<br>Q2 = 0.93 (0.41, 2.10)<br>Q3 = 1.50 (0.78, 2.90)<br>Q4 = 1.91 (1.02, 3.59) | Q1 = 2.40 (0.91, 6.33)<br>Q2 = 0.36 (0.05, 2.72)<br>Q3 = 2.62 (1.07, 6.42)<br>Q4 = 3.67 (1.58, 8.50) | Q1 = 0.73 (0.22, 2.46)<br>Q2 = 1.27 (0.51, 3.16)<br>Q3 = 0.85 (0.29, 2.47)<br>Q4 = 0.99 (0.34, 2.88)  |                                                                                                      |                                                                                                      |                                                                                                      |                                                                                                       |

**Supplementary Figure S2** Hazard Rate Ratios and 95% CIs for the risk of congenital malformation-related mortality in siblings of subfertile men by semen quality category relative to siblings of fertile controls. Model 1 shows the baseline results for males and females combined. Model 2 shows the gender specific estimates. Model 3 shows the non-proportional effects for males and females combined by age group. Model 3 results for total motile count, vitality, head morphology and tail morphology are not shown because these measures are only available for a subset of the sample and cell counts become too small when parsed by semen quality and three categories of age. Azoospermia was included as a separate category in each model. The results are stable across models because they constitute the same group of men. Cells highlighted in blue indicate significant differences between relatives of men with semen analysis and relatives of fertile controls. O = Oligozoospermia; N = Normozoospermia; H = Hyperzoospermia; Q1 = Quartile 1; Q2 = Quartile 2; Q3 = Quartile 3; Q4 = Quartile 4.
