# Supplementary material
Source: PubMed Central journal article supplement (PMC5165078)
Supplement: supp_dew289_dew289suppl_table1.pdf [file supp_dew289_dew289suppl_table1.pdf]

**Supplementary Table S1** Distribution of childhood mortality cause of death.

|                                                | <b>Sibs</b> |                   | <b>Aunt/uncle</b> |                   |
|------------------------------------------------|-------------|-------------------|-------------------|-------------------|
|                                                | <b>N</b>    | <b>% of total</b> | <b>N</b>          | <b>% of total</b> |
| Blood/blood-forming organs                     | *           | *                 | *                 | *                 |
| Bones/organs of movement                       | *           | *                 | *                 | *                 |
| Cancer                                         | 72          | 0.09              | 177               | 0.11              |
| Cardiovascular                                 | 19          | 0.02              | 71                | 0.05              |
| Congenital malformations                       | 153         | 0.19              | 150               | 0.10              |
| Diabetes and endocrine                         | *           | *                 | 29                | 0.02              |
| Digestive (chronic liver/cirrhosis)            | *           | *                 | 49                | 0.03              |
| Early infancy                                  | 27          | 0.03              | 55                | 0.04              |
| External causes                                | 352         | 0.45              | 805               | 0.52              |
| Genito-urinary (renal)                         | *           | *                 | 27                | 0.02              |
| Infectious                                     | 22          | 0.03              | 128               | 0.08              |
| Mental/psychoneurotic                          | *           | *                 | *                 | *                 |
| Nervous system (Parkinson/Alzheimer's disease) | 52          | 0.07              | 77                | 0.05              |
| Pregnancy/child-birth/puerperium               | *           | *                 | *                 | *                 |
| Respiratory (pneomonia)                        | 54          | 0.07              | 152               | 0.10              |
| Skin/subcutaneous tissue                       | *           | *                 | *                 | *                 |
| Symptoms/senility/ill-defined                  | 73          | 0.09              | 126               | 0.08              |
| Unknown COD/deceased outside Utah              | 120         | 0.15              | 3007              | 1.94%             |

\*Disease categories with 15 or fewer observations had exact numbers hidden to prevent identification of individuals.
